# Supplementary material for: Room-temperature phosphorescence in coal-based humic acid-derived carbon dots
Source: Royal Society of Chemistry journal article supplement (doi:10.1039/d4tc00787e), 2024-01-01
Supplement: d4tc00787e1.pdf [file d4tc00787e1.pdf]

## Electronic Supplementary Information

### Room-temperature Phosphorescence in Coal-based Humic Acid- derived Carbon Dots

Ziguo He<sup>\*a,b,d</sup>, Mukfung Yuen<sup>c</sup>, Cheng Zhang<sup>b</sup>, Jian Zhang<sup>b</sup>, Zhicai Wang<sup>\*b</sup>, Caibo Yue<sup>b</sup>, Mingfu Ye<sup>b</sup>, and Kui Zhang<sup>\*b</sup>

<sup>a</sup>. Engineering Technology Research Center of Optoelectronic Technology Appliance, Advanced Copper-based Materials Industry Generic Technology Research Center of Anhui Province, School of Mechanical Engineering, Tongling University, Tongling, Anhui 244061, China. E-mail: ziguohet@tlu.edu.cn

<sup>b</sup>. School of Chemistry and Chemical Engineering, Anhui University of Technology, Maanshan 243032, China. E-mail: caibo@ahut.edu.cn; zhangkui@mail.ustc.edu.cn

<sup>c</sup>. The Chinese University of Hong Kong, Shenzhen, Guangdong, 518172, China.

<sup>d</sup>. University of Science and Technology of China, Hefei, Anhui 230026, China.

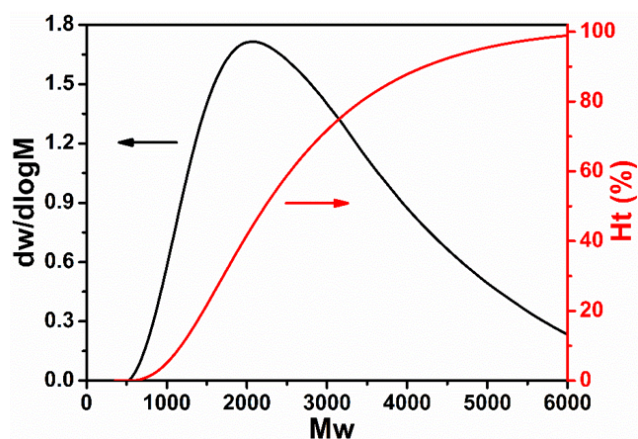

**Fig. S1.** The molecular weight distribution curve (*black line*) and mass integral molecular weight distribution curve (*red line*) of CBHA.

**Table S1** Statistical results of molecular weight of CBHA

| <b>Mp</b> | <b>Mn</b> | <b>Mw</b> | <b>Mz</b> | <b>Mz+1</b> | <b>Mv</b> | <b>PDI</b> |
|-----------|-----------|-----------|-----------|-------------|-----------|------------|
| 1441      | 1209      | 1550      | 1931      | 2311        | 1497      | 1.28       |

PDI: Polymer dispersity index.

**Table S2** The phosphor lifetime of the selected samples

| <b>Samples</b> | <b><math>\tau_1</math>(ms)</b> | <b><math>\tau_2</math>(ms)</b> | <b><math>\tau_3</math>(ms)</b> | <b>B<sub>1</sub></b> | <b>B<sub>2</sub></b> | <b>B<sub>3</sub></b> | <b><math>\tau_{average}</math>(ms)</b> |
|----------------|--------------------------------|--------------------------------|--------------------------------|----------------------|----------------------|----------------------|----------------------------------------|
| HACDs/BA-100   | 16.28                          | 141.58                         | 630.69                         | 378.39               | 36.36                | 11.74                | 293.83                                 |
| HACDs/BA-160   | 16.42                          | 146.63                         | 824.53                         | 4507.96              | 781.55               | 173.92               | 410.38                                 |
| HACDs/BA-180   | 17.54                          | 178.06                         | 877.43                         | 4847.31              | 1105.6<br>3          | 440.96               | 562.25                                 |
| HACDs/BA-210   | 13.58                          | 128.80                         | 795.65                         | 4636.15              | 866.29               | 226.00               | 446.70                                 |
| HACDs/BA-400   | 13.73                          | 138.75                         | 808.89                         | 5074.73              | 857.18               | 198.16               | 421.67                                 |

**Table S3** Phosphor lifetime of the selected samples

| Concentration<br>(mg·g <sup>-1</sup> ) | $\tau_1$ (ms) | $\tau_2$ (ms) | $\tau_3$ (ms) | B <sub>1</sub> | B <sub>2</sub> | B <sub>3</sub> | $\tau_{\text{average}}$ (ms) |
|----------------------------------------|---------------|---------------|---------------|----------------|----------------|----------------|------------------------------|
| 0                                      | 18.09         | 131.14        | 630.51        | 285.44         | 56.56          | 84.39          | 333.71                       |
| 0.05                                   | 12.98         | 126.80        | 782.55        | 3660.77        | 684.86         | 165.89         | 428.56                       |
| 0.15                                   | 13.69         | 135.65        | 814.84        | 2866.24        | 542.39         | 166.97         | 487.70                       |
| 0.25                                   | 17.54         | 178.06        | 877.43        | 4847.31        | 1105.6<br>3    | 440.96         | 562.25                       |
| 0.35                                   | 14.98         | 143.42        | 815.76        | 4395.65        | 784.47         | 206.03         | 445.18                       |

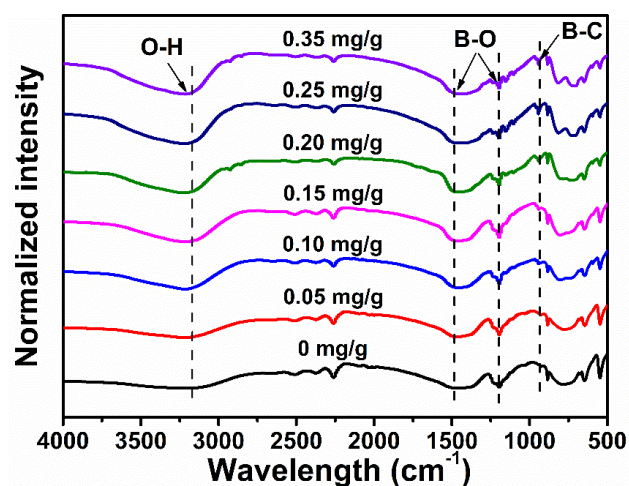

**Fig. S2.** FTIR spectra of HACDs/BA-180 at different HACDs concentrations.

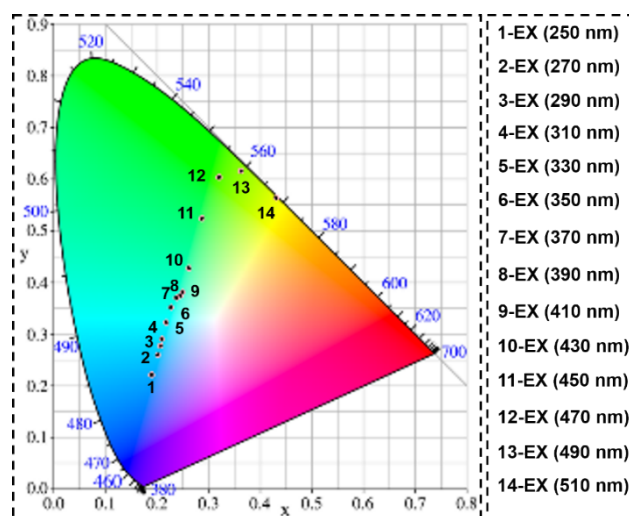

**Fig. S3.** CIE coordinates of HACDs/BA-180 under different excitation wavelengths.

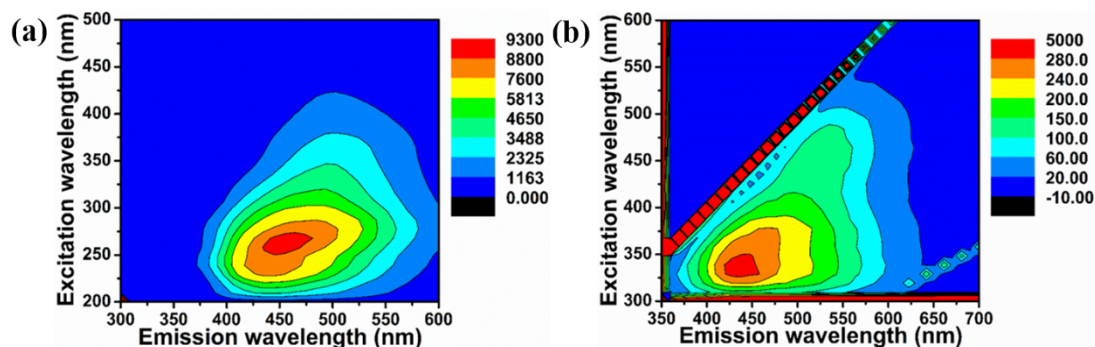

**Fig. S4.** (a) 3D RTP scan of HACDs/BA-180 and (b) 3D FL scan of HACDs/BA-180 aqueous solution.

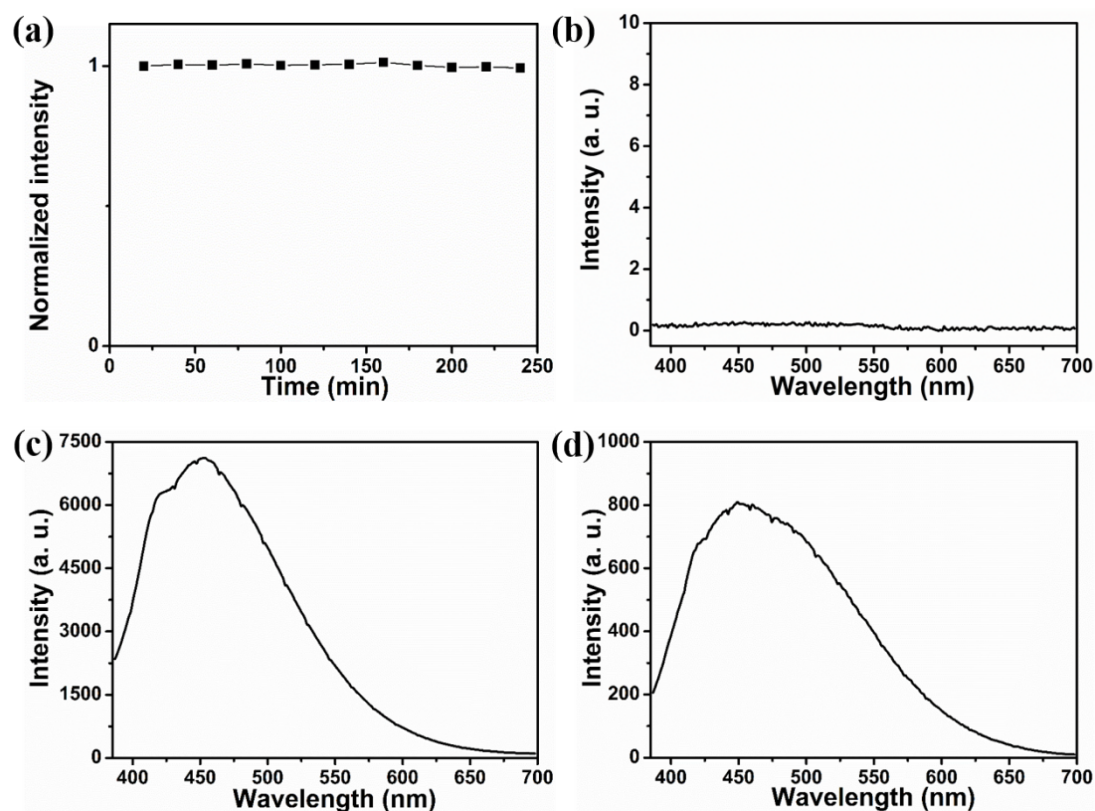

**Fig. S5.** (a) The RTP stability of HACDs/BA-180. (b) RTP spectra of HACDs/BA-180 in aqueous solution. (c) FL spectra of HACDs/BA-180 in aqueous solution. (d) FL spectra of HACDs in aqueous solution. (Excited at 365 nm)

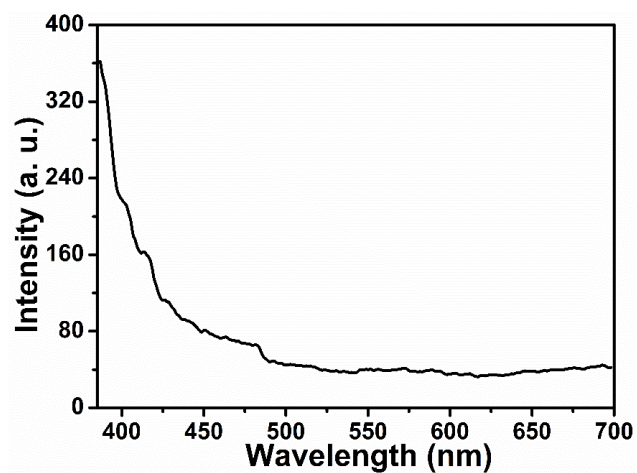

Fig. S6. FL spectra of BA-180 in aqueous solution excited at 365 nm.

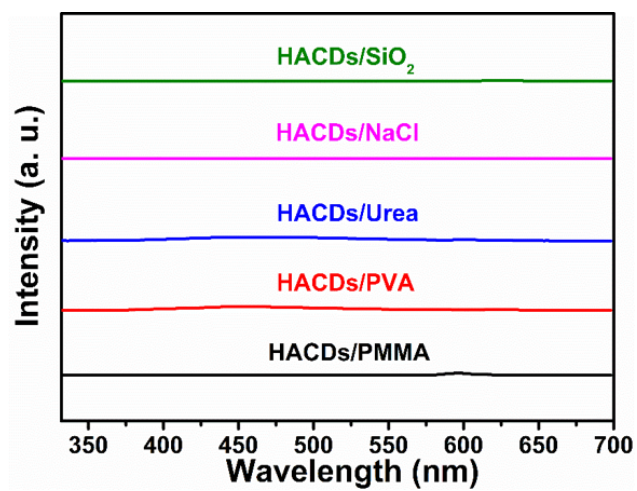

Fig. S7. RTP spectra of HACDs dispersed in different matrices.

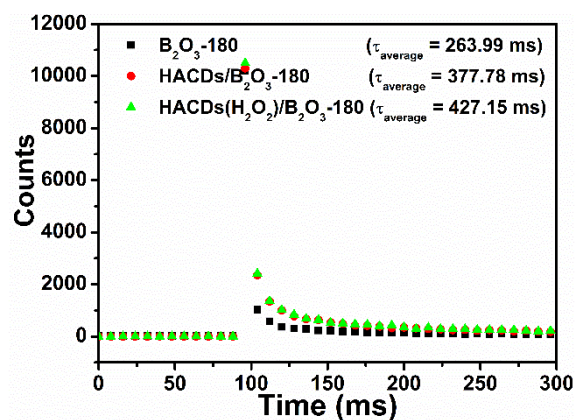

Fig. S8. RTP lifetimes of  $B_2O_3$ -180, HACDs/ $B_2O_3$ -180, HACDs( $H_2O_2$ )/ $B_2O_3$ -180.

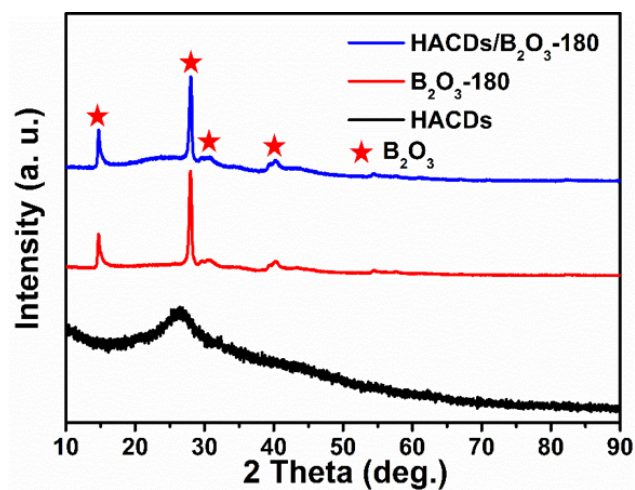

**Fig. S9.** XRD patterns of HACDs/B<sub>2</sub>O<sub>3</sub>-180 (*blue*), B<sub>2</sub>O<sub>3</sub>-180 (*red*), and HACDs (*black*).

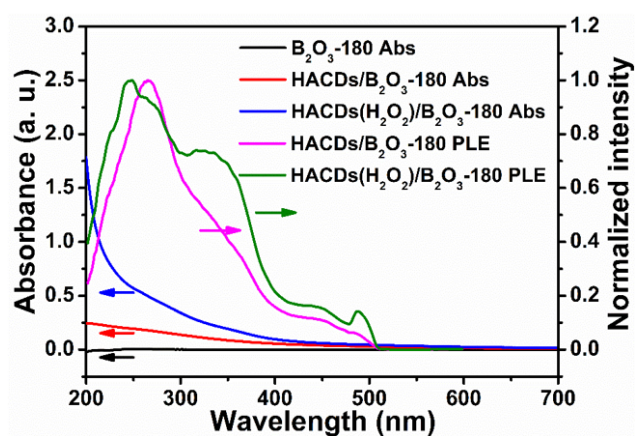

**Fig. S10.** UV-Vis spectra (*black, red, and blue line*) and PLE spectra (*pink and green line*) of different selected samples.



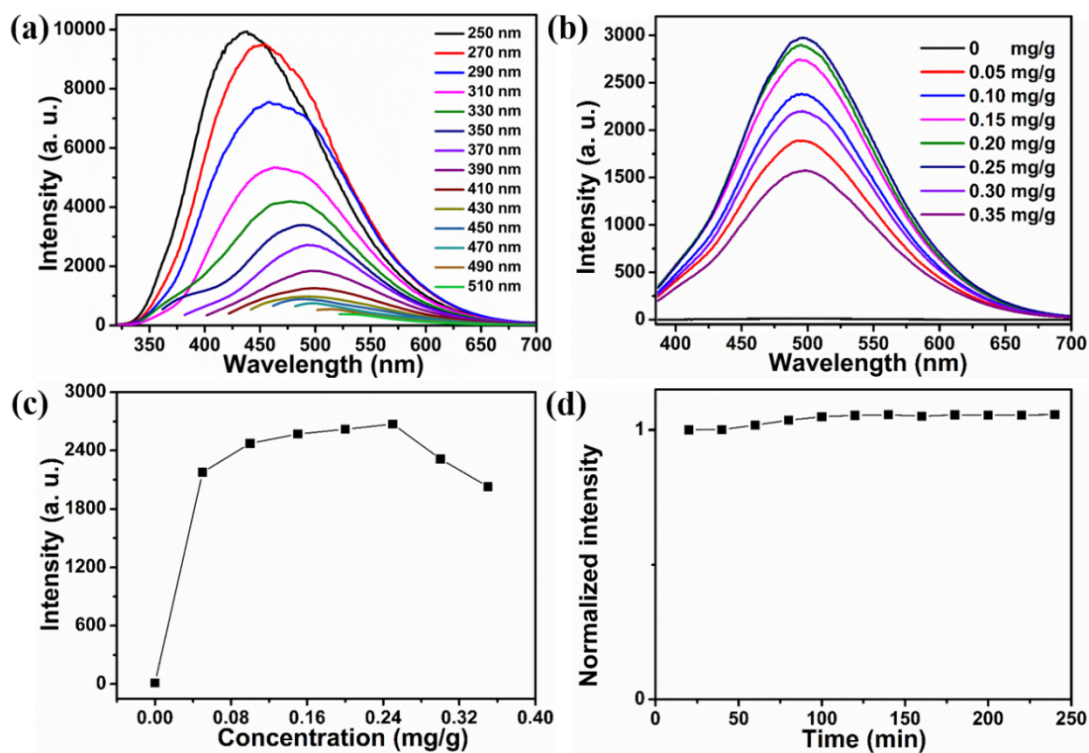

**Fig. S11.** (a) RTP spectra of HACDs/B<sub>2</sub>O<sub>3</sub>-180 at different excitation wavelengths. (b) RTP spectra, (c) RTP intensity of HACDs/B<sub>2</sub>O<sub>3</sub>-180 at different HACDs concentrations. (d) The RTP stability of HACDs/B<sub>2</sub>O<sub>3</sub>-180.

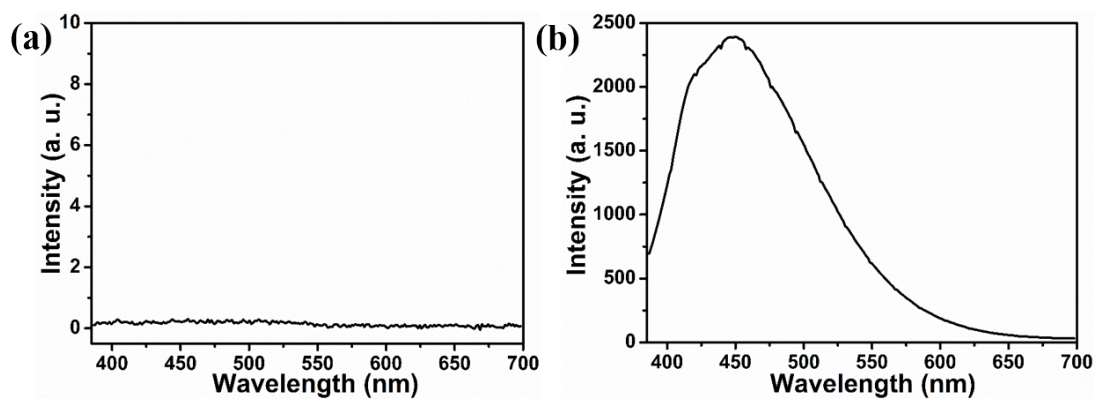

**Fig. S12.** (a) RTP spectra and (b) FL spectra of HACDs/B<sub>2</sub>O<sub>3</sub>-180 in aqueous solution excited at 365 nm.

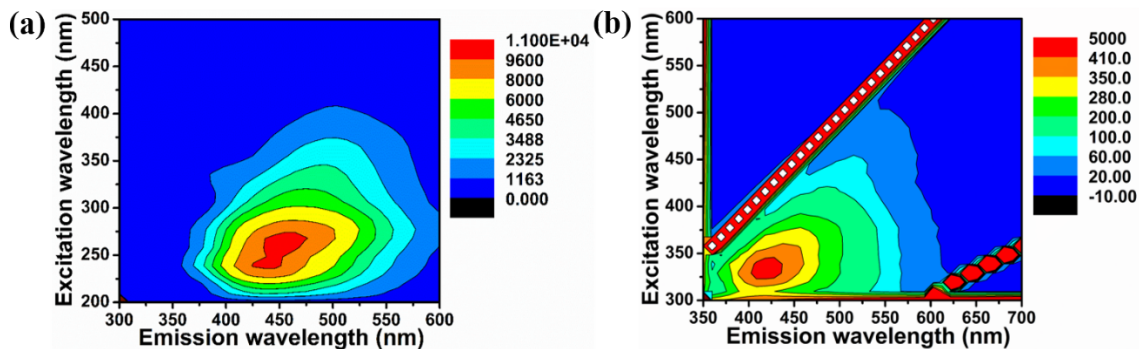

Fig. S13. (a) 3D RTP and (b) 3D FL scan of  $B_2O_3$ -180 aqueous solution.

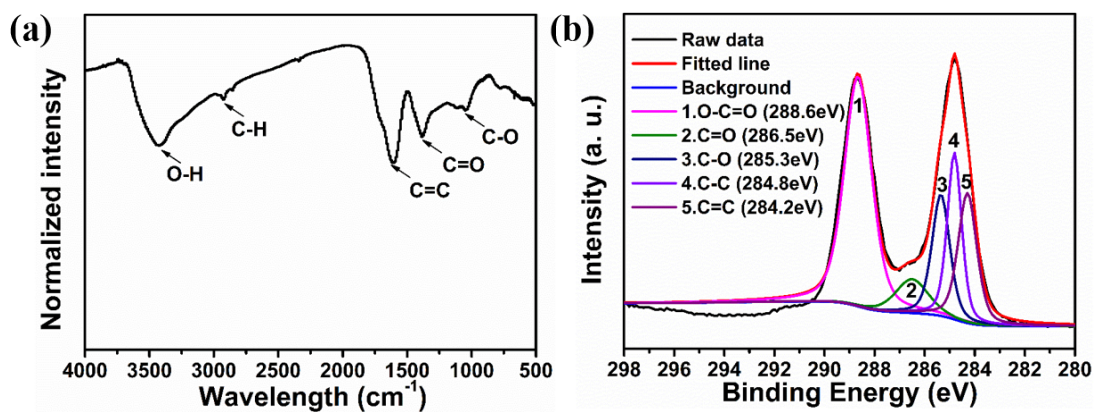

Fig. S14. (a) FTIR spectrum and (b) XPS high-resolution  $C_{1s}$  spectra of  $HACDs(H_2O_2)$ .

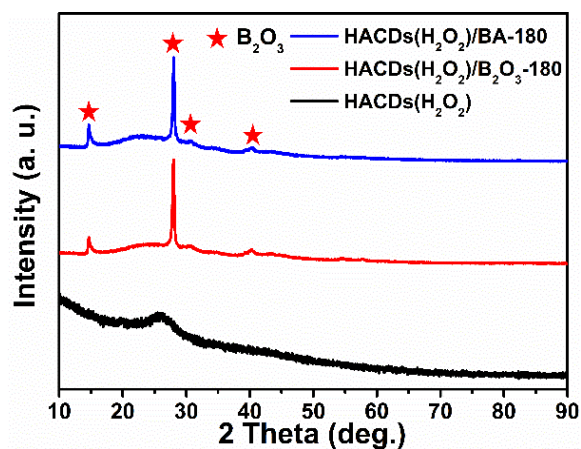

Fig. S15. XRD patterns of the selected samples.
